# Supplementary material for: Effect of the stability of 1,3-bis(diphenylphosphoryl)-2-oxapropane complexes on the separation of lanthanide ions and their detection
Source: Royal Society of Chemistry journal article supplement (doi:10.1039/d4dt02325k), 2024-01-01
Supplement: d4dt02325k1.pdf [file d4dt02325k1.pdf]

## FIGURES FROM THE SUPPLEMENTARY MATERIALS

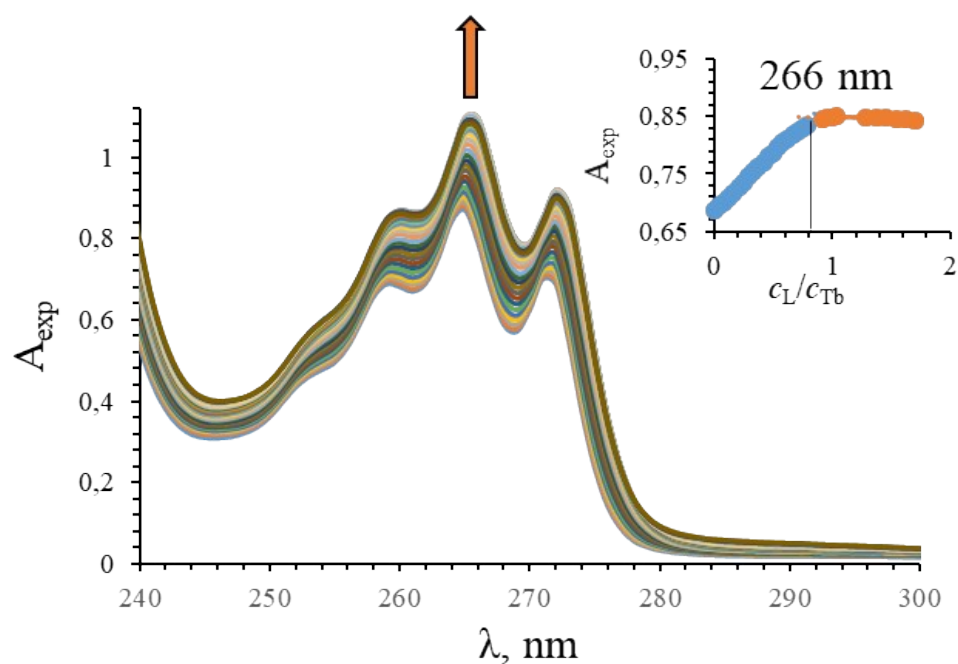

**Fig. S1** Electronic absorption spectra upon titration of L with terbium nitrate,  $c_L = 2.96 \cdot 10^{-4}$  mol/L (acetonitrile solutions)

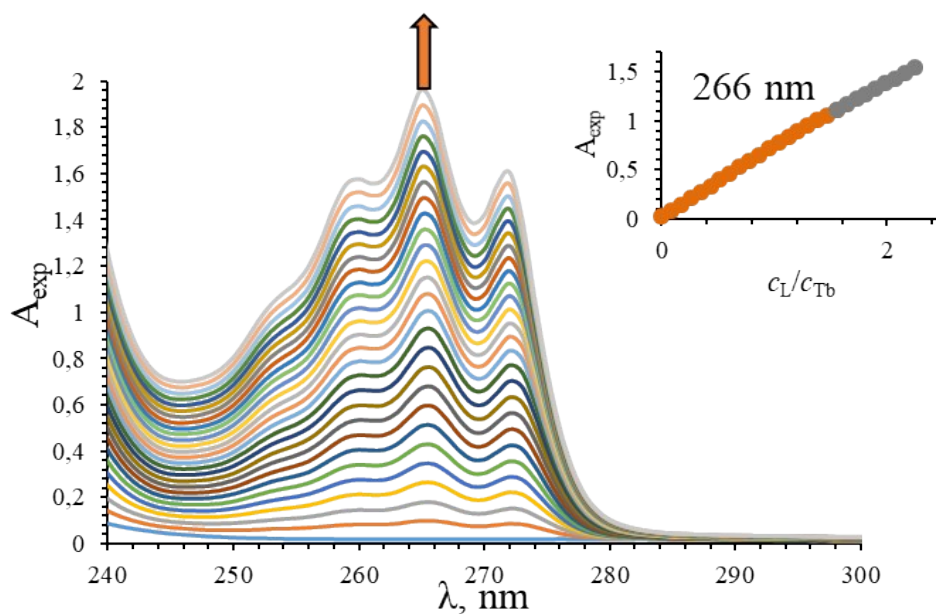

**Fig. S2** Electronic absorption spectra upon titration of terbium nitrate with L,  $c_{\text{Tb}} = 2.5 \cdot 10^{-4}$  mol/L (acetonitrile solutions)

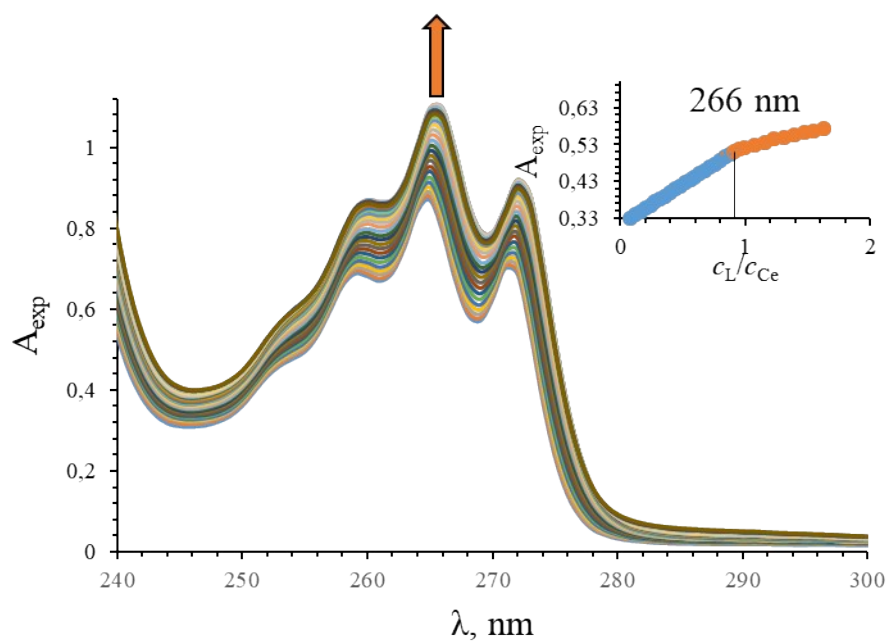

**Fig. S3** Electronic absorption spectra upon titration of L with cerium nitrate,  $c_L = 1.59 \cdot 10^{-4}$  mol/L (acetonitrile solutions)

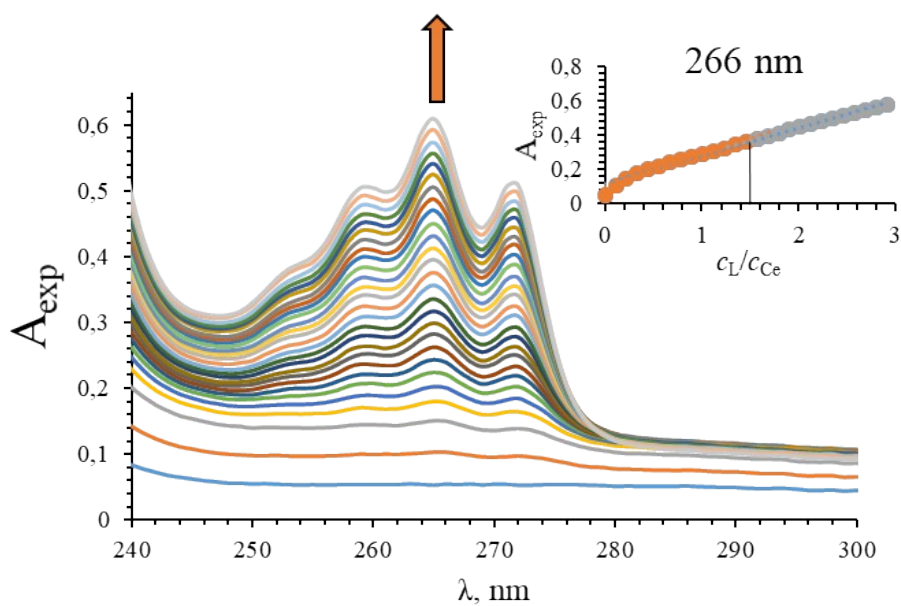

**Fig. S4** Electronic absorption spectra upon titration of cerium nitrate with L,  $c_{\text{Ce}} = 6.30 \cdot 10^{-5}$  mol/L (acetonitrile solutions)
