# Supplementary material for: Effect of the stability of 1,3-bis(diphenylphosphoryl)-2-oxapropane complexes on the separation of lanthanide ions and their detection
Source: Royal Society of Chemistry journal article supplement (doi:10.1039/d4dt02325k), 2024-01-01
Supplement: d4dt02325k2.pdf [file d4dt02325k2.pdf]

## Supplementary materials

### Effect of the stability of 1,3-bis(diphenylphosphoryl)-2-oxapropane complexes on the separation of lanthanide ions and their detection

Serafima S. Slobodskaya<sup>a,\*</sup>, Galina S. Tsebrikova<sup>a</sup>,  
Vitaly P. Solov'ev<sup>a</sup>, Irina S. Ivanova<sup>b</sup>, Elena N. Pyatova<sup>b</sup>, Vladimir E. Baulin<sup>c</sup>,  
Alfiya M. Safiulina<sup>d,e</sup>, Aslan Yu. Tsivadze<sup>a</sup>

<sup>a</sup> *Frumkin Institute of Physical Chemistry and Electrochemistry, Russian Academy of Sciences, Moscow 119071, Russia*

<sup>b</sup> *Kurnakov Institute of General and Inorganic Chemistry, Russian Academy of Sciences, Moscow 119991 Russia*

<sup>c</sup> *Institute of Physiologically Active Substances, Federal Research Center for Problems of Chemical Physics and Medicinal Chemistry, Russian Academy of Sciences, Chernogolovka, Moscow region 142432, Russia*

<sup>d</sup> *Joint-stock company "Advanced Research Institute of Inorganic Materials named after Academician A. A. Bochvar", Moscow 123098, Russia*

<sup>e</sup> *Mendeleev Russian university of chemical technology, Moscow 125047, Russia*

\* e-mail: [SlobodskayaSi@yandex.ru](mailto:SlobodskayaSi@yandex.ru)

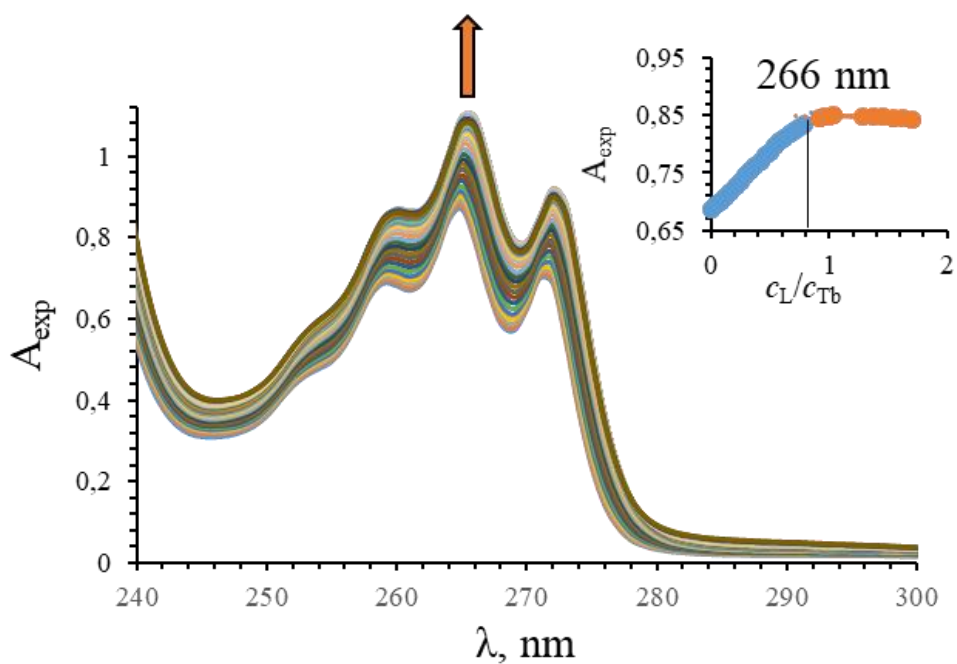

**Fig. S1** Electronic absorption spectra upon titration of L with terbium nitrate,  $c_L = 2.96 \cdot 10^{-4}$  mol/L (acetonitrile solutions)

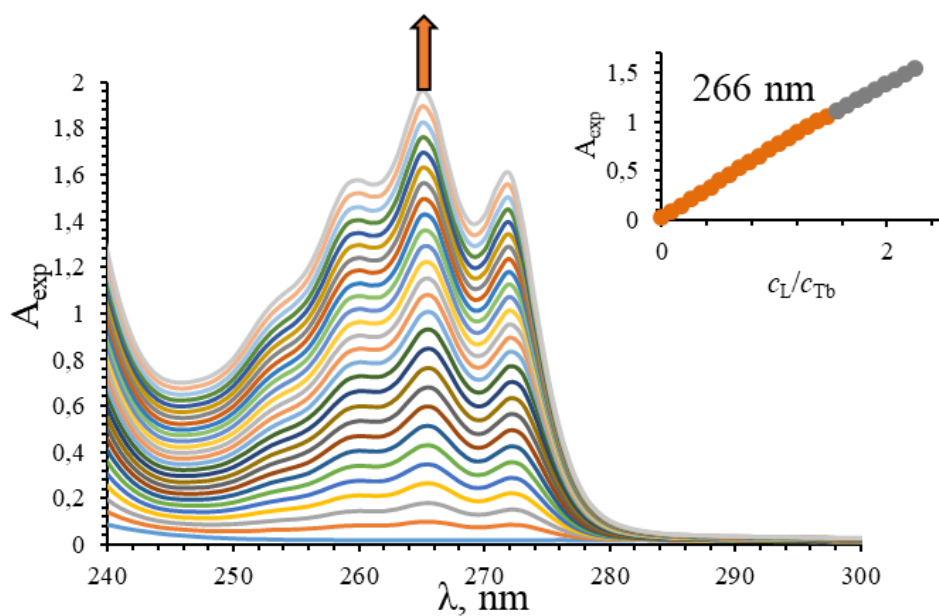

**Fig. S2** Electronic absorption spectra upon titration of terbium nitrate with L,  $c_{Tb} = 2.5 \cdot 10^{-4}$  mol/L (acetonitrile solutions)

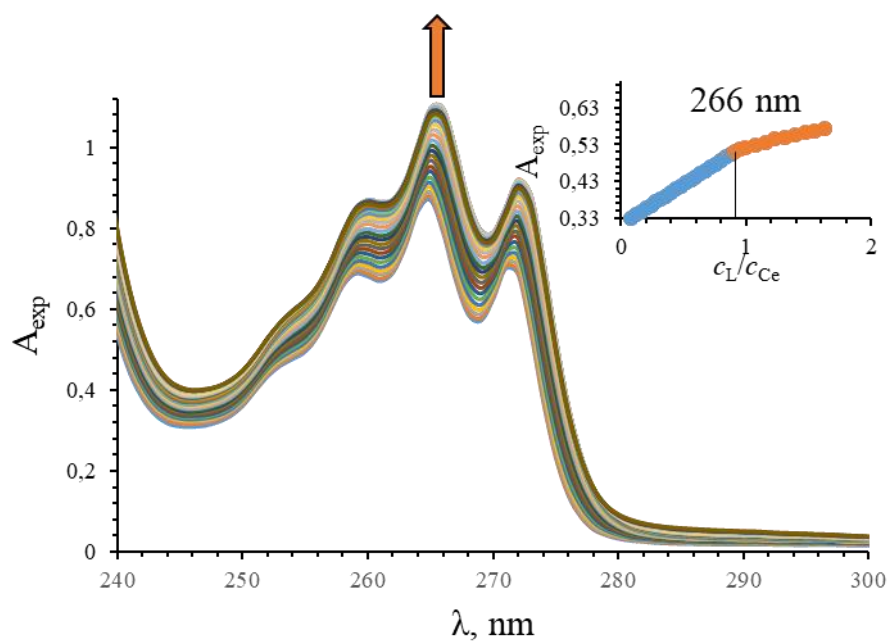

**Fig. S3** Electronic absorption spectra upon titration of L with cerium nitrate,  $c_L = 1.59 \cdot 10^{-4}$  mol/L (acetonitrile solutions)

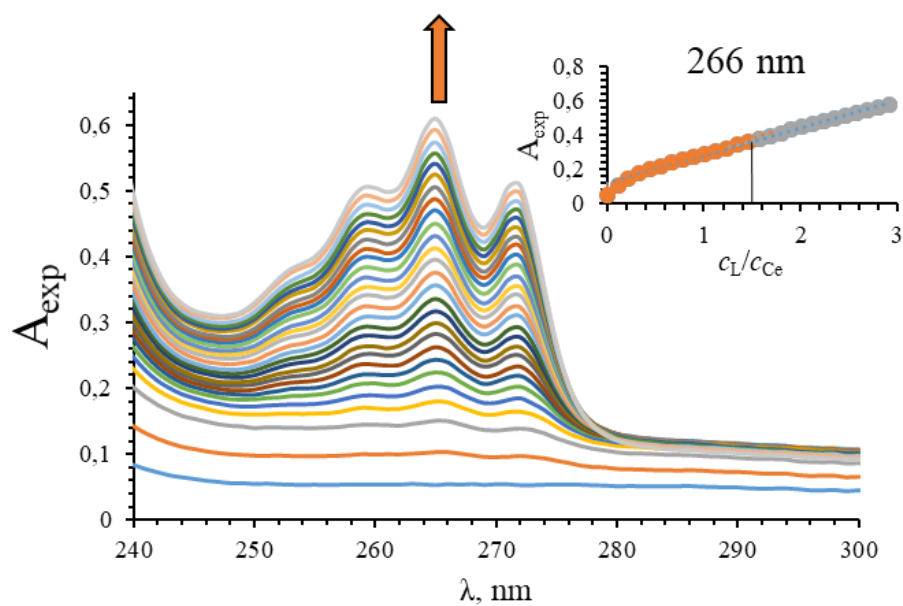

**Fig. S4** Electronic absorption spectra upon titration of cerium nitrate with L,  $c_{Ce} = 6.30 \cdot 10^{-5}$  mol/L (acetonitrile solutions)
